1 **Behavioral and postural analyses establish sleep-like states for mosquitoes that can impact**  
2 **host landing and blood feeding**

3

4

5 Oluwaseun M. Ajayi<sup>1\*</sup>, Justin M. Marlman<sup>1</sup>, Lucas A. Gleitz<sup>1</sup>, Evan S. Smith<sup>1</sup>,

6 Benjamin D. Piller<sup>1</sup>, Justyna A. Krupa<sup>1</sup>, Clément Vinauger<sup>2</sup> and Joshua B. Benoit<sup>1\*</sup>

7

8 <sup>1</sup>Department of Biological Sciences, University of Cincinnati, Cincinnati, OH 45221, USA

9 <sup>2</sup>Department of Biochemistry, Virginia Polytechnic Institute and State University, Blacksburg,

10 VA 24061, USA

11

12

13

14

15

16 \*Authors for correspondence

17 Oluwaseun M. Ajayi and Joshua B. Benoit

18 Department of Biological Sciences,

19 University of Cincinnati, OH 45221, USA

20 E-mail: [ajayiom@mail.uc.edu](mailto:ajayiom@mail.uc.edu) and [joshua.benoit@uc.edu](mailto:joshua.benoit@uc.edu)

21 Phone: 513-556-9714

22

23

24

25 **Abstract**

26 Sleep is an evolutionarily conserved process that has been described in different animal systems.  
27 For insects, sleep characterization has been primarily achieved using behavioral and  
28 electrophysiological correlates in a few systems. Sleep in mosquitoes, which are important vectors  
29 of disease-causing pathogens, has not been directly examined. This is surprising as circadian  
30 rhythms, which have been well studied in mosquitoes, influence sleep in other systems. In this  
31 study, we characterized sleep in mosquitoes using body posture analysis and behavioral correlates,  
32 and quantified the effect of sleep deprivation on sleep rebound, host landing and blood-feeding  
33 propensity. Body and appendage position metrics revealed a clear distinction between the posture  
34 of mosquitoes in their putative sleep and awake states for multiple species, which correlate with a  
35 reduction in responsiveness to host cues. Sleep assessment informed by these posture analyses  
36 indicated significantly more sleep during periods of low activity. Nighttime and daytime sleep  
37 deprivation resulting from the delivery of vibration stimuli induced sleep rebound in the  
38 subsequent phase in day and night active mosquitoes, respectively. Lastly, sleep deprivation  
39 suppressed host landing in both laboratory and field settings and also impaired blood feeding of a  
40 human host when mosquitoes would normally be active. These results suggest that quantifiable  
41 sleep states occur in mosquitoes, and highlight the potential epidemiological importance of  
42 mosquito sleep.

43

44 **Keywords:** sleep, sleep deprivation, mosquito, host landing, blood feeding

45

46

47

## 48 **Introduction**

49 Sleep is a phenomenon universally observed across the animal kingdom with notable description  
50 in cnidarians [1], nematodes [2], arthropods [3,4], and mammals [5]. During sleep, animals lose  
51 connection with their external environment, as a result of attenuated sensory processing and motor  
52 outputs which pose significant predation risks to the individuals [6]. In this process, individuals  
53 cannot search for food resources, engage in parental care or evade detrimental situations, which  
54 indicate that sleep is of essential benefits when considering its trade-offs [4]. In vertebrates  
55 (particularly mammals), acute sleep deprivation results in impaired cognition [7,8], while chronic  
56 sleep deprivation has been implicated in hallucinations, speech delay, and sometimes death [9,10].  
57 Similarly, the importance of sleep has been established in invertebrates, especially in insects.  
58 Studies have shown that sleep deprivation significantly reduces the precision of waggle dance  
59 signaling in honey bees (*Apis mellifera*) [11], and results in short- and long-term memory defects,  
60 along with a multitude of other factors, in fruit flies (*Drosophila melanogaster*) [12,13].

61 Characterization of parameters underlying sleep is evaluated using different approaches  
62 [5]. However, the two classical and robust hallmarks of sleep-like states in a variety of animals  
63 have been behavioral and/or electrophysiological correlates [14,15]. Modulations in brain wave  
64 activity, which is measured using electroencephalography in mammals or recordings of local field  
65 potentials in invertebrates, can establish specific electrophysiological correlates of sleep [16,17].  
66 Behaviorally, sleep can be characterized using the following features: (i) species-specific postures,  
67 (ii) reversible prolonged quiescence in certain periods in the circadian day, (iii) increased arousal  
68 threshold or decreased response to stimuli, and (iv) rebound or recovery sleep in response to sleep  
69 deprivation [15]. For many animal systems, the establishment of behavioral factors is sufficient  
70 in characterizing the sleep-like state.

71 Despite the characterization of sleep in insect systems including fruit flies [18,19],  
72 cockroaches [3], bees [20,21], and wasps [22], and the likely benefits of sleep [23–25], little is  
73 known about sleep in blood-feeding arthropods. There has been limited focus on sleep in  
74 mosquitoes, unlike established roles of circadian rhythm (which is linked to/influences sleep in  
75 many animals) on mosquito biology [26–28]. The entirety of sleep-based research in mosquitoes  
76 may be restricted to only two studies: (i) an early study on the resting postures of *Aedes aegypti*  
77 [29], but this study did not consider these resting postures as sleep-like states, and (ii) our recent  
78 review that provides lines of evidence for sleep-like conditions in mosquitoes, including the  
79 potential of unique postural differences between sleep-like and awake states in a single mosquito,  
80 *Ae. aegypti* [30].

81 In this study, we provide the characterization of sleep-like states in mosquitoes based on  
82 behavioral features established in other systems and show the effect of sleep deprivation on  
83 epidemiologically relevant aspects of mosquito biology: their locomotor activity, host landing, and  
84 blood-feeding propensity. Our results indicate that; sleep-like states occur in mosquitoes with  
85 quantifiable postural metrics which correlate with increased arousal threshold, and mosquito sleep  
86 deprivation induces subsequent sleep rebound and impairs host landing and blood feeding during  
87 normally active periods. This first extensive evaluation in mosquitoes represents an ideal model  
88 for understanding the importance of sleep in blood feeding arthropods.

## 89 90 **Results**

### 91 **Distinct postural differences exist between putative sleep-like and active (awake) states in** 92 **multiple mosquito species**

93 Sleep states induce a behavioral quiescence typically associated with an animal-specific  
94 stereotypical posture [31–34]. In *Ae. aegypti*, we previously showed that prolonged immobilization

95 was associated with a prostrate state where the hind legs are lowered and the thorax and abdomen  
96 brought closer to the substrate [29]. Here, we examined whether different postural states occur  
97 across mosquito species and if these states are correlated with prolonged periods of inactivity. We  
98 video recorded adult *Ae. aegypti*, *Culex pipiens*, and *Anopheles stephensi* females in groups of 20  
99 females within acrylic containers (16 oz mosquito breeder; BioQuip, Rancho Dominguez, CA,  
100 USA) whose top was covered by a fabric mesh. After an acclimatization period of 2 hours to reduce  
101 the impact of previous host manipulation, pictures were taken from outside the experimental room  
102 by remote accessing the computer controlling the camera (Figure 1A). Principal Component  
103 Analysis (PCA) of the hind leg angle relative to the mosquito's main body axis, the body angle  
104 relative to the substrate, the elevation of the hind leg relative to the substrate, and the elevation of  
105 the thorax relative to the substrate, revealed a clear clustering of each species' body posture  
106 (ANOSIM:  $R = 0.204$ ;  $p < 0.001$ ) and a distinct clustering of postures associated with mosquitoes  
107 in prolonged immobilization ( $>30$  min) (ANOSIM:  $R = 0.824$ ;  $p < 0.001$ ) (Figure 1B).  
108 Interestingly, the analysis of similarity's R statistics, which compares the mean of ranked  
109 dissimilarities between groups to the mean of ranked dissimilarities within groups, revealed a  
110 stronger dissimilarity between sleep/activity states than between mosquito species ( $R = 0.824$  and  
111  $0.204$ , respectively). Analysis of the contribution of each variable to the principal components  
112 (PCs) revealed that the hind leg angle contributed to 99.4% of the variance explained by PC1  
113 (88.9%), and the body angle contributed to 99.3% of the variance explained by PC2 (11%). In  
114 other words, while the body angle seems mostly driven by interspecific differences, the position  
115 of the hind legs appears as a reliable indicator of prolonged rest states.

116 In a second postural assay, adult females of *Ae. aegypti*, *Cx. pipiens*, and *An. stephensi*  
117 were individualized in plastic *Drosophila* tubes (25mm x 95mm, Genesee Scientific, San Diego,

118 CA, USA) and, for each assay, 20 tubes of females of the same species were positioned  
119 horizontally, in the field of view of a video camera (C920, Logitech, Lausanne, Switzerland).  
120 Every 10 minutes, the posture of each individual was recorded and classified as ‘active’ or ‘rest’  
121 based on the angle of the hind legs relative to the main body axis. For all three species, regardless  
122 of whether the experiment was conducted during the last 3 hours of the photophase, or during the  
123 first 3 hours of the scotophase (to capture the activity peaks of both nocturnal and diurnal species),  
124 the proportion of mosquitoes in a sleep-like posture was strongly correlated with the amount of  
125 time spent in the absence of external stimulation (Figures 1C, 1D and 1E; *Ae. aegypti* photophase:  
126 Pearson correlation coefficient  $r = 0.907$ ; scotophase:  $r = 0.978$ ; *Cx. pipiens* photophase:  $r = 0.983$ ;  
127 scotophase:  $r = 0.929$ ; *An. stephensi* photophase:  $r = 0.959$ ; scotophase:  $r = 0.906$ ;  $n = 30$  each).  
128 Although a log-rank test revealed no significant differences between scotophase and photophase  
129 sleep curves, the amount of time required for 50% of individuals to be in a sleep-like posture was  
130 larger during the photophase than during the scotophase for the diurnal *Ae. aegypti*, conversely to  
131 the nocturnal *Cx. pipiens* and *An. stephensi*.

132         Of importance is that in *Cx. pipiens* and *Ae. aegypti*, there is a reduction in response to host  
133 cues, indicated by a reduction in flight activity triggered by the presence of an experimenter, for  
134 individuals in prolonged resting/sleep state (Table 1). This provides evidence that the sleep-states  
135 are likely correlated with increased arousal threshold. Overall, these results indicate that there are  
136 distinct postures associated with putative sleep-like states in mosquitoes, that individuals will enter  
137 these postural states more rapidly during the circadian period associated with lower activity, and  
138 that these states correlate with increased arousal thresholds in both diurnal and nocturnal species.

139  
140

141

142 **Circadian timing and amount of sleep-like period differ among multiple mosquito species**

143 One important hallmark of sleep is that organisms (studied so far) experience reversible prolonged  
144 periods of immobility/inactivity during a particular phase of the circadian day [2,18,19,35,36]. To  
145 determine periods of putative sleep (lack of activity) in mosquitoes, we quantified the rest-activity  
146 rhythm of *Ae. aegypti*, *An. stephensi*, and *Cx. pipiens* using an infrared-based activity monitoring  
147 system during a 24-hr circadian day. In *Drosophila*-based studies, sleep is usually defined as a  
148 period of inactivity lasting at least for 5 minutes and the occurrence of rest (putative sleep) is  
149 inversely related to the number of activity counts (beam breaks) recorded per a given time  
150 [18,19,37]. This short period of 5 minutes is not appropriate for mosquitoes. Rather, we quantified  
151 the sleep profile for mosquitoes using a period of inactivity lasting 120 minutes based on the time  
152 required for 50% of mosquitoes to enter a sleep-like state (Figures 1C, 1D and 1E).

153 Based on historical observations of field-based mosquito feeding behavior, we  
154 hypothesized that *Ae. aegypti* (a diurnal mosquito *i.e.*, “day biter” [38,39]) will have increased  
155 activity during the photophase (day time) and rest *i.e.*, putative sleep will be well consolidated in  
156 the scotophase (night time). Laboratory measurements in *Ae. aegypti* show that activity increases  
157 from mid-day till the onset of light off, but activity reduces significantly throughout the night after  
158 light off (Figure 2A). Putative sleep for *Ae. aegypti* decreases from mid-day till the end of the  
159 photophase, but putative sleep is well consolidated in the scotophase (Figure 2D). This is an exact  
160 inverse of what we reported in the activity profile.

161 Comparative analysis conducted in *Cx. pipiens* (a crepuscular-dark active species [40])  
162 shows that activity is consistently low during the day but increases in anticipation of light off *i.e.*,  
163 dusk (Figure 2B) and putative sleep is reduced significantly from dusk into the first-half of the  
164 night (Figure 2E). For the nocturnal mosquito *i.e.*, “night biter” [28], *An. stephensi* increased

165 activity from early night into the mid-night, with activity reducing as day approaches (Figure 2C).

166 Putative sleep occurred throughout the day for *An. stephensi* (Figure 2F).

167 Sleep amount in minutes was quantified for our laboratory strains of mosquitoes, with

168 comparisons made among the three species. There was a significant difference in the mean total

169 sleep among the three mosquito species (Kruskal-Wallis test:  $\chi^2 = 7.221$ ;  $p = 0.027$ ), where the

170 difference exists only between *Ae. aegypti* and *Cx. pipiens* (Dunn's multiple comparison:  $p = 0.027$ ;

171 Figure 2G). As expected, daytime and nighttime sleep amount differs among the species (Kruskal-

172 Wallis test: daytime,  $\chi^2 = 36.831$ ;  $p < 0.001$ ; nighttime,  $\chi^2 = 65.519$ ;  $p < 0.001$ ; Figure 2H);

173 however, there was no difference between *Cx. pipiens* and *An. stephensi* for both day and night.

174 Together, these results reveal the marked differences in timing and amount of sleep-like periods

175 in different mosquitoes species.

176  
177 **Sleep deprivation induces sleep rebound in *Aedes aegypti* and *Anopheles stephensi* depending**  
178 **on the phase of perturbation**

179 Sleep deprivation in mosquitoes was assessed for subsequent sleep rebound when individuals are

180 normally active. In *Ae. aegypti*, sleep deprivation by mechanical disturbance was conducted for 12

181 hrs during the night, 4 hrs during the night, and 12 hrs during the day. However, in *An. stephensi*,

182 sleep deprivation was only done for 12 hrs during the day for comparative observations with the

183 day-active *Ae. aegypti*.

184 *Ae. aegypti* mosquitoes subjected to sleep deprivation throughout the night recorded a

185 significant sleep loss of about 558 minutes when you compare with sleep amount of the preceding

186 night (Wilcoxon signed rank test:  $V = 1122$ ;  $p < 0.001$ ; Figure S1E). This sleep loss promoted a

187 significant rebound in the subsequent photophase, with a gain of approximately 76 minutes of

188 sleep (Paired t-test:  $t = 3.463$ ;  $p = 0.001$ ; Figure 3A). A significant sleep loss of nearly 159 minutes



189 occurred in *Ae. aegypti* mosquitoes that experienced sleep disruption in the first four hours of the  
190 night (Wilcoxon signed rank test:  $V = 1672.500$ ;  $p < 0.001$ ; **Figure S1F**). Even this short amount  
191 of lost sleep early in the night was adequate to induce sleep rebound in the following day; a  
192 significant sleep gain of nearly 1 hour was reported (Paired t-test:  $t = 3.846$ ;  $p < 0.001$ ; **Figure 3B**).

193 In the *Ae. aegypti* mosquitoes subjected to sleep deprivation during the photophase, the  
194 amount of sleep lost by comparing with sleep amount in the baseline day was approximately 436  
195 minutes (Wilcoxon signed rank test:  $V = 2013$ ;  $p < 0.001$ ; **Figure S1G**). However, this failed to  
196 yield a significant sleep gain in the subsequent night, indicating that sleep deprivation during a  
197 normally active period does not generate a rebound (Paired t-test:  $t = 0.378$ ;  $p = 0.707$ ; **Figure**  
198 **3C**). This was not the case for *An. stephensi* mosquitoes, as daytime sleep deprivation in this  
199 species mirrored that of nighttime sleep deprivation in *Ae. aegypti*, which was expected as this  
200 species is active at night. A significant sleep loss of about 594 minutes was reported (Wilcoxon  
201 signed rank test:  $V = 666$ ;  $p < 0.001$ ; **Figure S1H**), which induced a significant sleep recovery in  
202 the subsequent scotophase (Wilcoxon signed rank test: sleep gain = 196 mins;  $V = 73$ ;  $p < 0.001$ ;  
203 **Figure 3D**).

204 The influence of sleep deprivation in mosquitoes was also examined in relation to another  
205 sleep architecture *i.e.*, sleep bout duration. Results showed that sleep deprivation promoted a  
206 significantly increased sleep bout duration in the subsequent light phase for both the 12 hrs  
207 nighttime (Wilcoxon signed rank test:  $V = 994$ ;  $p < 0.001$ ; **Figure 3E**) and 4 hrs nighttime  
208 deprivations in *Ae. aegypti* (Wilcoxon signed rank test:  $V = 1364$ ;  $p < 0.001$ ; **Figure 3F**). As  
209 expected, daytime sleep deprivation in *Ae. aegypti* did not significantly impact sleep bout duration  
210 in the subsequent night (Paired t-test:  $t = 0.481$ ;  $p = 0.633$ ; **Figures 3G** and **S1I**). Although, daytime  
211 sleep deprivation in *An. stephensi* significantly promoted sleep gain in the subsequent night, sleep

212 bout duration was not significantly affected (Wilcoxon signed rank test:  $V = 64$ ;  $p = 0.216$ ; **Figures**  
213 **3H** and **S1J**). From our results, mosquitoes deprived of sleep during the normal periods of low  
214 activity, experience sleep rebound in the subsequent phase, but there was no sleep recovery if sleep  
215 deprivation occurs during their normally active period.

216  
217 **Sleep deprivation in *Aedes aegypti* suppresses host landing in both laboratory and field**  
218 **settings, and impairs blood-feeding propensity**

219 The impact of sleep deprivation on host landing in *Ae. aegypti* both in laboratory and field  
220 mesocosm experiments was assessed to establish a specific role in relation to interactions with  
221 potential hosts. In specific, the number of mosquitoes that landed on an artificial host 4 hours after  
222 a long-night sleep deprivation were assessed at different time points. In the laboratory assay, the  
223 proportion of mosquitoes that landed was lower in the sleep deprived group when compared with  
224 control at all time points (**Figure 4A**). Similar results were also observed in the field, with a lesser  
225 proportion of mosquitoes landing on the artificial host at all time points in the sleep deprived group  
226 in comparison with the control counterparts (**Figure 4B**).

227 A general linear model assessing host landing status ('landed' and 'not landed') relative to  
228 treatment (sleep deprived and control) was utilized to examine for significance. Host landing was  
229 significantly explained by sleep deprivation in the lab-based assay ( $p < 0.001$  for all time points,  
230 **Figure 4A**). In the field-based studies (**Figure 4B**), no significance was noted at 5 mins ( $p = 0.199$ )  
231 but variation in host landing was significantly explained by sleep deprivation at 10 mins ( $p = 0.002$ )  
232 and 15 mins ( $p < 0.001$ ).

233 In addition, we evaluated the effect of sleep deprivation on blood-feeding propensity, as a  
234 proxy for vectorial capacity. This was done by quantifying the number of mosquitoes that blood  
235 fed on a volunteer host, 4 hours after a 12-hr nighttime sleep deprivation. Result shows that sleep

236 deprivation impairs blood-feeding propensity, with a significantly lesser proportion of mosquitoes  
237 able to blood feed in the sleep deprived group (about 54% reduction) in comparison with control  
238 (Wilcoxon rank sum test:  $W = 58.5$ ;  $p < 0.01$ ; **Figure 4C**).

239 Overall, host landing is significantly suppressed by sleep deprivation in both lab and field  
240 conditions and sleep deprivation induced a reduction in blood feeding during the periods when *Ae.*  
241 *aegypti* females are typically active.

242

## 243 **Discussion**

244 Our studies establish the occurrence of sleep-like states in mosquitoes including *Ae. aegypti*, *Cx.*  
245 *pipiens* and *An. stephensi* based on some of the conventional behavioral features described in other  
246 insect systems. These consist of a consolidated period of inactivity/immobility in a particular phase  
247 of the circadian day, postural differences between active (awake) state and putative sleep state, and  
248 the occurrence of sleep recovery following sleep disruption. Lastly, the influence of sleep  
249 deprivation on mosquito biology and their role in disease transmission was established by  
250 identifying that a reduced arousal while in sleep states when a host is present and host landing and  
251 blood feeding patterns can be altered by sleep deprivation.

252 Sleeping arthropods assume obvious sleep postures. For example, antennal positions are  
253 associated with sleep in *A. mellifera*, where the scapes are positioned almost horizontally close to  
254 the head surface, and the pedicels with their flagella assume a vertical position during the night,  
255 which are different during locomotor activity in the subjective day [20]. In the same insect system,  
256 small swaying movements of the antennae are associated with the resting state [20]. In the  
257 nocturnal cockroach, *Blaberus giganteus*, raised body posture and antennal movements are  
258 predominant in the dark period, while rest during the day is associated with the body and the

259 antennae touching the substrate [41]. In *D. melanogaster*, individual flies move away from their  
260 food source and take up a prone position prior to resting [18]. Respiratory abdominal pumping and  
261 small sporadic proboscis extension/retraction are the only movements that occur during the sleep-  
262 like state in these flies [18]. Evidence for postural differences between active and sleep-like states  
263 in mosquitoes was successfully established in our study for three mosquito species, with whole  
264 body orientation and most importantly hind leg angle providing significant distinctions between  
265 these states. This is the first study in insects where the orientation of the insect leg is a feature  
266 distinguishing sleep-like condition from the active state. Interestingly, a subtle difference was seen  
267 between the culicine species (*Ae. aegypti* and *Cx. pipiens*) and the anopheline species (*An.*  
268 *stephensi*). In the latter species, leg angle was not strong enough to show conspicuous difference  
269 between the active and sleep-like states. Unlike what is found in the culicines, during non-flight  
270 activity, adult *Anopheles* mosquito typically has its abdomen pointing away from the substrate,  
271 thereby forming an angle of 30-45° with the substrate (or resting surface) [42]. Legs of anophelines  
272 are generally longer than those of culicines [42]; these might explain the weak difference between  
273 active and sleep-like states based only on leg orientation.

274         Historical observations of biting/feeding and resting behavior in the field have shown that  
275 these occur at different periods of the day in mosquito species, being modulated by circadian  
276 rhythms [43,44]. *Aedes* mosquitoes feed mostly and are active during the day, while *Cx. pipiens*  
277 and *An. stephensi* have increased feeding activity during the twilight and night respectively; these  
278 differences in feeding and resting time matched our laboratory observations in this study  
279 [28,38,40]. Furthermore, the reduction in arousal when in the sleep states we observed in *Ae.*  
280 *aegypti* and *Cx. pipiens* could be a contributing factor in why these mosquitoes do not observe  
281 feeding, even when a host is present, during the night and day, respectively. In *Drosophila*-based

282 studies where the flies were subjected to 12hr: 12hr photophase/scotophase, prolonged periods of  
283 rest were observed in the dark period, similar to what we observed in *Ae. aegypti* [19,37,45]. The  
284 most significant difference between these studies and this current one is the duration of immobility  
285 used to establish sleep. While a 5-min period of inactivity was sufficient to define sleep in  
286 *Drosophila*, a period of no activity for at least 120 minutes was used in our study for mosquitoes  
287 based on postural and arousal observations. The strong preference for rest in the photophase for  
288 *An. stephensi* and *Cx. pipiens* is similar to what was reported in two cockroach species;  
289 *Leucophaea maderae* and *B. giganteus* [3,41]. Furthermore, the difference in circadian timing of  
290 sleep-like states (low activity) observed among the different mosquito species in this study is not  
291 surprising, as there are reports in other studies of differences in several aspects of activity/rest  
292 rhythm among closely related species, but these studies are limited to a few comparisons in fruit  
293 flies and wasps [46,47]. Sleep rebound is an important hallmark of sleep, where there is an increase  
294 in sleep following sleep disruption in the phase an individual normally sleeps i.e. a homeostatic  
295 regulation of sleep [15]. This phenomenon has been confirmed in different arthropods including  
296 scorpions [48], cockroaches [3,41], honey bees [49], and fruit flies [18,19], and also in other non-  
297 arthropod systems [1,2,50]. In the present study, we observed an increase in sleep amount in the  
298 subsequent phase as a result of nighttime and daytime sleep deprivation in *Ae. aegypti* and *An.*  
299 *stephensi*, respectively. As expected, daytime sleep deprivation did not induce sleep rebound in  
300 *Ae. aegypti*, similar to the result for daytime sleep deprivation in a *Drosophila*-based study [19].  
301 This indicates a compensatory increase in sleep following nighttime sleep deprivation in *Ae.*  
302 *aegypti* was not driven by increased activity but by sleep loss.

303 Sleep deprivation impacts a diverse range of biological processes in animals including  
304 cognition, metabolism, alertness, reproduction, and immunity [51,52]. In honey bees, foraging

305 efficiency of nestmates is affected due to the negative effect of sleep deprivation on waggle dance  
306 signaling [11]. Short- and long-term memory are both disrupted by nighttime sleep deprivation in  
307 *Drosophila* [12,13], but adequate sleep tends to facilitate memory and learning improvement  
308 [53,54]. In another study, sleep deprivation in *Drosophila* was reported to suppress aggressive  
309 behaviors, with a serious implication on reproductive fitness [55]. Importantly, a strong link  
310 between sleep and immune function have been established in *Drosophila* [56], and studies have  
311 shown that reduced sleep leads to increased resistance to bacterial infection and a major category  
312 of genes that increased expression due to sleep deprivation is involved in immune function [57,58].  
313 These results are particularly interesting for our study system because circadian rhythms modulate  
314 immune response [59], and immunity is one of the main factors that influence disease transmission  
315 in mosquitoes [26]. Although our study was solely behavioral elucidation of sleep, and we did not  
316 consider the influence of sleep deprivation on immune response, however, we were able to show  
317 the potential effect of sleep disruption on mosquito's vectorial capacity by measuring host landing,  
318 blood-feeding propensity and arousal when host is present, which are critical to obtain a blood  
319 meal and transmit pathogens [60]. Laboratory and field mesocosm experiments revealed that *Ae.*  
320 *aegypti* mosquitoes had significantly reduced response to a host mimic after nighttime sleep  
321 deprivation. Based on studies in other systems, sleep deprived *Ae. aegypti* are sleeping more during  
322 the day to recover their lost sleep from the previous night, thereby displaying an increased arousal  
323 threshold to host stimulation - an important hallmark of sleep [15]. The successful transmission of  
324 diseases by mosquitoes is heavily reliant on a pathogen-carrying mosquito encountering a host at  
325 a specific time that matches, and eventually introducing the infective stage of the pathogen to the  
326 host during feeding [61]. We predicted that sleep deprivation will affect disease transmission, since  
327 blood-feeding propensity was also significantly impaired in our study. Furthermore, the acquisition

328 of a specific pathogen requires the vector feeds at a specific time when stages are present in the  
329 blood that can establish within the vector [62,63]. Hence, altered host landing and blood feeding  
330 in mosquitoes due to sleep deprivation could change the dynamics between host, pathogens, and  
331 disease vector. These interacting aspects indicate there is an urgent need to investigate the  
332 influence of sleep deprivation on other components of vectorial capacity as this would improve  
333 current disease modeling and vector control strategies.

334

## 335 **Materials and Methods**

### 336 **Mosquito husbandry**

337 Three mosquito species were used; *Aedes aegypti*, *Culex pipiens*, and *Anopheles stephensi*. *Culex*  
338 *pipiens* colonies used for this study were originally collected in 2015 from Columbus, OH, and  
339 supplemented with field-collected individuals every two to three years (Buckeye strain), while  
340 those of *Ae. aegypti* and *An. stephensi* were acquired from Benzon Research (Carlisle, PA, USA)  
341 and BEI Resources (*Ae. aegypti*, Rockefeller strain, MR4-735; *An. stephensi*) for postural analysis.  
342 Mosquito colonies were maintained in the laboratory at the University of Cincinnati at 25°C, 80%  
343 relative humidity (RH) under a 15hr: 9hr light/dark (L/D) cycle with access to water and 10%  
344 sucrose *ad libitum* and at Virginia Tech under the same conditions for the postural analysis.  
345 Mosquito eggs were produced from 4-5 weeks old females through artificial feeding (Hemotek,  
346 Blackburn, United Kingdom) with chicken or rabbit blood (Pel-Freez Biologicals, Rogers, AZ,  
347 USA). Upon egg hatching, larvae were separated into 18 cm x 25 cm x 5 cm containers (at a density  
348 of 250 individuals per container) and were fed finely ground fish food (Tetramin, Melle,  
349 Germany). For the experiments, pupae were collected and maintained in an incubator at 24°C, 70-  
350 75% RH, under a 12hr:12hr L/D cycle until adult emergence. Adult mosquitoes that emerged were

351 provided with access to water and 10% sucrose *ad libitum*. Unless otherwise stated, all adult female  
352 mosquitoes used for the laboratory-based experiments were aged 5-8 days post-ecdysis. However,  
353 adult female mosquitoes (12-17 days old) were collected directly from the maintained laboratory  
354 colonies for the field-based experiments. As the experimenters represent potential blood-host to  
355 the mosquitoes in all experiments, studies were conducted in isolated experimental rooms and  
356 incubators to eliminate potential disturbances from the experimenter. Remote computer access and  
357 automated data collection were used to prevent exposure to host-based factors.

## 358 359 **Posture analysis**

### 360 *Quantification of postural changes associated with prolonged immobility*

361 To quantify body postures associated with putative sleep states, groups of 20, 5-7 day old adult  
362 females of *Ae. aegypti*, *Cx. pipiens*, and *An. stephensi* were enclosed within acrylic containers (16  
363 Oz mosquito breeder; BioQuip, Rancho Dominguez, CA, USA) covered by a fabric mesh at the  
364 top. Containers were positioned within the field of view of an infrared camera (PointGrey Firefly  
365 MV FMVU-03MTC, FLIR, Wilsonville, OR, USA) connected to a computer. After the  
366 experimenter left the room, mosquitoes were left unperturbed for 2 hours to allow acclimatation  
367 to the experimental environment. Then, the experimenter remote-accessed the computer and  
368 pictures of individual mosquitoes were taken during a one hour window. Only mosquitoes that  
369 were landed perpendicular to the focal plane of the camera, with their legs clearly visible were  
370 conserved for the analysis (*Ae. aegypti*: n = 22; *Cx. pipiens*: n = 41; *An. stephensi*: n = 17). All  
371 experiments were conducted on sugar fed but never blood fed females during the last 2 hours of  
372 the photophase. Depending on whether the focal mosquito was seen moving its appendages (*e.g.*,  
373 grooming, moving of the legs), it was either classified as “active” or “at rest”. Saved images were  
374 imported in ImageJ (National Institutes of Health, USA) where the hind leg angle relative to the



375 mosquito's main body axis, the body angle relative to the substrate, the elevation of the hind leg  
376 relative to the substrate, and the elevation of the thorax relative to the substrate were measured.  
377 All length measurements (in pixels) were normalized to the length of the mosquito's body, from  
378 tip of the abdomen to the top of the thorax. Repeated measurements of the same image showed a  
379 tracking error of 2.41 pixels for lengths, which represents a fraction of the thickness of the hind  
380 legs, and an error of 0.61 degrees for angles. A Principal Component Analysis (PCA) was  
381 conducted in R version 3.6.3, and an ANOSIM (package *vegan* version 2.5-6) was performed to  
382 test for the dissimilarity between species, as well as between "active" and "at rest" mosquitoes.

### 383 384 *Time course analysis of body postures*

385 Adult females of each species were individualized in plastic *Drosophila* tubes (25mm x 95mm,  
386 Genesee Scientific, San Diego, CA, USA) and, for each replicate (n =3), 20 tubes of females of  
387 the same species were positioned horizontally, in the field of view of a video camera (C920,  
388 Logitech, Lausanne, Switzerland). Every 10 minutes for the last 3 hours of the photophase and for  
389 the first 3 hours of the scotophase, the posture of each individual was recorded and classified as  
390 'active' or 'at rest' based on the angle of the hind legs relative to the main body axis. Analysis of  
391 the data was performed in R.

### 392 393 **Basic rest-activity rhythms**

394 The rest-activity rhythms of the three mosquito species were quantified using a Locomotor  
395 Activity Monitor 25 (LAM25) system (TriKinetics Inc., Waltham, MA, USA) and the  
396 DAMSystem3 Data Collection Software (TriKinetics). Originally, these systems were developed  
397 for *Drosophila* but recently have been utilized to measure the activity levels of several blood-  
398 feeding arthropods, including mosquitoes [64–66]. Individual mosquitoes were placed in 25 x 150

399 mm clear glass tubes with access to water and 10% sucrose provided *ad libitum*. These tubes were  
400 placed horizontally in the LAM25 system which allows the simultaneous recording of 32  
401 mosquitoes in an “8 x 4” horizontal by vertical matrix during a single trial. The entire set-up was  
402 held in a light-proof low-temperature incubator supplied with its own lighting system at 24°C, 70-  
403 75% RH, under a 11hr:11hr L/D cycle (with 1hr dawn and 1hr dusk transitions). After the  
404 acclimation of the mosquitoes for 2 days, activity level was recorded as the number of times (in a  
405 minute) a mosquito crosses an infrared beam of the LAM25 in the middle of the locomotor tube.  
406 Data collected with the DAMSystem3 for a duration of 5 days (with the removal of mosquitoes  
407 that were not alive till the end of the assay) were analyzed using the Rethomics platform in R with  
408 its associated packages such as *behavr*, *ggetho*, *damr* and *sleepr* [67].

#### 409 410 **Sleep deprivation assay**

411 Following the acclimation of the mosquitoes for 2 days and the establishment of a 24-hour baseline  
412 day in the LAM25 system, sleep deprivation was conducted in the specific phase of interest. Sleep  
413 deprivation was achieved in the mosquitoes through the delivery of vibration stimuli (vibration  
414 amplitude = 3G) using a Multi-Tube Vortex Mixer (Ohaus, Parsippany, NJ, USA) attached to the  
415 LAM25 system. In the diurnal *Ae. aegypti* mosquitoes, three different sleep deprivation protocols  
416 were conducted based on modifications from a *Drosophila* study [55]: 12hr nighttime deprivation  
417 (12NTD), 4hr nighttime deprivation (4NTD) and 12hr daytime deprivation (DTD). Whereas in the  
418 nocturnal *An. stephensi* mosquitoes, only DTD was conducted. To accomplish 12NTD, a sequence  
419 of vibration pulses lasting 1 minute, followed by 5 minutes of rest between pulses was programmed  
420 for the entire scotophase subsequent to the baseline day (see **Figure S1A**). In 4NTD, vibration  
421 pulses lasted for 1 minute followed by 1 minute of rest between pulses in the first 4 hours of the  
422 night (Zeitgeber time 12 - 16) following the baseline day. This was done in such a way that the

423 total number of vibration pulses obtainable in 12NTD was delivered in a short time frame (see  
424 **Figure S1B**). DTD in *Ae. aegypti* and *An. stephensi* was conducted similarly to 12NTD, the only  
425 difference is that DTD was accomplished during the photophase that succeeds the baseline day  
426 (see **Figures S1C** and **S1D**).

427 To calculate sleep loss, we used the mean difference of the sleep amounts in the scotophase  
428 (12NTD and 4NTD) or photophase (DTD) preceding the deprivation and that of the scotophase  
429 (12NTD and 4NTD) or photophase (DTD) during the deprivation. For the calculation of sleep  
430 gain, we used the mean difference of the sleep amounts in the photophase (12NTD and 4NTD) or  
431 scotophase (DTD) after the deprivation and that of the photophase (12NTD and 4NTD) or  
432 scotophase (DTD) before the deprivation.

#### 433 434 **Host landing and blood feeding assays**

435 Host landing following 4 hours post-sleep deprivation (PSD) was assessed in *Ae. aegypti*  
436 mosquitoes both in laboratory and field conditions. In the lab-based study, sleep deprivation  
437 protocol was similar to 12NTD (described under “Sleep deprivation assay”). The only difference  
438 was that a “17.5 cm x 17.5 cm x 17.5 cm” knitted mesh-nylon cage (BioQuip) housing mosquitoes  
439 (10 per replicate) was attached to the Multi-Tube Vortex Mixer to achieve sleep loss, with the  
440 entire set-up held in a room isolated from host cues ( $26 \pm 1^\circ\text{C}$ ,  $75 \pm 5\%$  RH, and 12hr:12hr L/D  
441 cycle). In the field-based experiment, adult female mosquitoes were released into similar cages  
442 described earlier (10 mosquitoes per replicate), which were then placed into “47.5 cm x 47.5 cm x  
443 47.5” knitted mesh-nylon cages (BioQuip). To achieve bulk sleep deprivation, the entire set-up  
444 was situated in a city environment, where high activity occurs. The control set-up was also placed  
445 in the same environment as the sleep-deprived counterpart, but located in a secluded area that  
446 experiences significantly reduced disturbances. To determine the number of mosquitoes that

447 landed on a host mimic, we used techniques adapted from previous studies [68,69]. A host mimic  
448 (Hemotek feeder) filled with a mixture of water and 100µl artificial eccrine perspiration (Pickering  
449 Laboratories, Mountain View, CA, USA) heated to 37°C was covered three times with parafilm  
450 and placed on top of the experimental cage. Incidental contact was distinguished from foraging  
451 contact by using mosquitoes that landed and remained for at least 5 seconds on the feeder. By  
452 recording using a video camera (7 White, GoPro, San Mateo, CA, USA), the number of mosquitoes  
453 that made foraging contact was counted in the lab experiment at 10 mins, 20 mins, 40 mins and 60  
454 mins after the artificial host was turned on. In the field experiment, this was counted only after 5  
455 mins, 10 mins and 15 mins. Result was expressed as a proportion of the total mosquitoes that  
456 remained alive at the end of the experiment, and compared with the control group.

457 To assess the influence of sleep deprivation on blood-feeding propensity in mosquitoes,  
458 Adult female *Ae. aegypti* were exposed to the legs of a volunteer human host for 5 minutes after 4  
459 hours PSD (Approved by the University of Cincinnati IR 2021-0971). The set-up and sleep  
460 deprivation protocol in this experiment were similar to the lab-based host landing assay described  
461 above. The number of mosquitoes that successfully blood fed (shown by engorged abdomen) in  
462 the sleep-deprived group was compared to that of control (non-sleep deprived group), and  
463 expressed as a proportion of the total mosquitoes that stayed alive throughout the duration of the  
464 assay.

#### 465 **Reduction in host responsiveness**

467 To determine if prolonged sleep-like states reduced the response of mosquitoes, we performed  
468 basic host cue response studies on two species (*Ae. aegypti* and *Cx. pipiens*). Mosquitoes were  
469 observed through video and after 0, 30, 60, 120, and 240 minutes of inactivity, the experimenter  
470 entered the room and exhaled on the cage to provide a host cue. The number of mosquitoes that

471 took flight within thirty seconds following exposure to experimenter breath was used as a proxy  
472 for host response. Each time point was conducted on 8-14 mosquitoes for each species.

473

474 **Quantification and statistical analysis**

475 Experimental replicates utilized for the study are distinct samples and biologically independent.

476 Sample sizes for the different experiments are mentioned in the methods or in the associated figure

477 legend. Statistical tests, and significance between groups are detailed within each figure and/or in

478 the figure legend. All analyses were done in R version 3.6.3.

479

480

481

482

483

484

485

486

487

488

489

490

491

492

493

494

495 **Figure legends**

496 **Figure 1: Prolonged inactivity is associated with stereotypical body postures in multiple**  
497 **mosquito species.** (A). Representative pictures of adult females *Aedes aegypti* (top row), *Culex*  
498 *pipiens* (middle row), and *Anopheles stephensi* (bottom row) either in active state (left column) or  
499 at rest (right column). (B). Principal component analysis of the ensemble of postural measures.  
500 The colors of points and grouping contours indicate the species and status of each point: Green:  
501 *Ae. aegypti* (n = 22); blue: *Cx. pipiens* (n = 41); orange: *An. stephensi* (n = 17). Darker colors  
502 indicate rest and lighter colors indicate active states. (C). Proportion of mosquitoes displaying a  
503 sleep posture as a function of time for each species (n = 3 replicates; N = 120 individuals each).  
504 Proportions were quantified either during the photophase (lighter colors), or during the scotophase  
505 (darker colors).

506

507 **Figure 2: Timing and amount of sleep differ among multiple mosquito species.** Basic activity  
508 rhythm of (A) *Aedes aegypti*, (B) *Culex pipiens* and (C) *Anopheles stephensi* over an 24-hour  
509 period. The y axis represents the mean beam crosses made by all the mosquitoes. Sleep profile of  
510 (D) *Aedes aegypti*, (E) *Culex pipiens* and (F) *Anopheles stephensi* averaged into a single 24-hour  
511 period. The y axis shows the proportion of time spent sleeping (defined as inactive periods of 120  
512 minutes), averaged for each mosquito within a 30 min time window. The x axis for all the plots  
513 represents the Zeitgeber time (ZT0 - ZT24). The solid lines and the shaded areas display means  
514 and their 95% bootstrap confidence interval, respectively. White and black horizontal bars  
515 represent the photophase and scotophase, respectively. Comparison of (G) total sleep and (H)  
516 daytime and nighttime sleep among the three mosquito species. Error bars denote SE of the mean  
517 sleep amount. Different letters indicate significant differences between treatment groups (Kruskal-

518 Wallis Test with Dunn's multiple comparison post hoc,  $p < 0.05$ ). In all the analyses,  $n = 60$  for  
519 both *Aedes aegypti* and *Culex pipiens* and  $n = 34$  for *Anopheles stephensi*.

520

521 **Figure 3: Sleep deprivation induces sleep rebound in both *Aedes aegypti* and *Anopheles***

522 *stephensi*. Comparison of sleep amounts before and after sleep deprivation in (A) 12hr nighttime

523 sleep deprivation experiment in *Aedes aegypti* ( $n = 48$ ), (B) 4hr nighttime sleep deprivation

524 experiment in *Aedes aegypti* ( $n = 59$ ), (C) 12hr daytime sleep deprivation experiment in *Aedes*

525 *aegypti* ( $n = 64$ ) and (D) 12hr daytime sleep deprivation experiment in *Anopheles stephensi* ( $n =$

526 36). Comparison of average bout durations before and after sleep deprivation in (E) 12hr nighttime

527 sleep deprivation experiment in *Aedes aegypti* ( $n = 48$ ), (F) 4hr nighttime sleep deprivation

528 experiment in *Aedes aegypti* ( $n = 59$ ), (G) 12hr daytime sleep deprivation experiment in *Aedes*

529 *aegypti* ( $n = 48$ , individuals with zero values were excluded) and (H) 12hr daytime sleep

530 deprivation experiment in *Anopheles stephensi* ( $n = 13$ , individuals with zero values were

531 excluded). Test of significant difference between groups was carried out using paired t-test or

532 wilcoxon signed rank test where applicable (ns = not significant, \*\* =  $p < 0.01$ , \*\*\* =  $p < 0.001$ ).

533

534 **Figure 4: Host landing and blood-feeding propensity are impaired by sleep deprivation in**

535 *Aedes aegypti*. Mean proportion of *Aedes aegypti* mosquitoes that landed on the artificial host at

536 different time points following sleep deprivation during the subsequent photophase in the (A)

537 laboratory assay ( $n = 8$  tests of 10 mosquitoes each) and (B) field mesocosm experiment ( $n = 13$

538 tests of 10 mosquitoes each). (C) Proportion of *Aedes aegypti* mosquitoes that blood fed during

539 the subsequent photophase after sleep deprivation ( $n = 8$  tests of 10 mosquitoes each). Error bars

540 denote SE of the mean proportion of mosquitoes that landed on the artificial host. A general linear

541 model and wilcoxon rank sum test were used to assess significant differences in host landing and  
542 blood feeding between the treatment groups, respectively (ns = not significant, \*\* =  $p < 0.01$ , \*\*\*  
543 =  $p < 0.001$ ).

544  
545 **Table 1 - Prolonged inactive, sleep-like periods reduce the responsiveness of mosquitoes to a**  
546 **potential host.** Data represent the percent response (mean +/- SE) that show flight within thirty  
547 seconds following exposure to experimenter breath.

| Time (minutes) of inactivity | <i>Aedes aegypti</i>         | <i>Culex pipiens</i>         |
|------------------------------|------------------------------|------------------------------|
| 0                            | 0.85 +/- 0.10 <sup>a</sup>   | 0.54 +/- 0.15 <sup>a</sup>   |
| 30                           | 0.82 +/- 0.12 <sup>a</sup>   | 0.44 +/- 0.17 <sup>a,b</sup> |
| 60                           | 0.67 +/- 0.14 <sup>a,b</sup> | 0.36 +/- 0.15 <sup>a,b</sup> |
| 120                          | 0.40 +/- 0.22 <sup>b</sup>   | 0.25 +/- 0.22 <sup>a,b</sup> |
| 240                          | 0.46 +/- 0.15 <sup>b</sup>   | 0.21 +/- 0.12 <sup>b</sup>   |

548  
549  
550  
551  
552  
553  
554  
555  
556  
557  
558



559 **Supplemental materials**

560 **Figures**

561 **Figure S1** - Experimental design and activity profile of (A) 12hr nighttime sleep deprivation  
562 experiment in *Aedes aegypti* (n = 48), (B) 4hr nighttime sleep deprivation experiment in *Aedes*  
563 *aegypti* (n = 59), (C) 12hr daytime sleep deprivation experiment in *Aedes aegypti* (n = 64) and (D)  
564 12hr daytime sleep deprivation experiment in *Anopheles stephensi* (n = 36). The y axis represents  
565 the mean beam crosses made by all the mosquitoes, and the x axis represents the Zeitgeber time.  
566 The solid lines and the shaded areas show population means and their 95% bootstrap confidence  
567 interval, respectively. White and black horizontal bars represent the photophase and scotophase,  
568 respectively. ‘a’ denotes the phase before sleep deprivation and ‘b’ denotes the phase after sleep  
569 deprivation. Comparison of sleep amounts between baseline and during sleep deprivation in (E)  
570 12hr nighttime sleep deprivation experiment in *Aedes aegypti* (n = 48), (F) 4hr nighttime sleep  
571 deprivation experiment in *Aedes aegypti* (n = 59), (G) 12hr daytime sleep deprivation experiment  
572 in *Aedes aegypti* (n = 64) and (H) 12hr daytime sleep deprivation experiment in *Anopheles*  
573 *stephensi* (n = 36). Comparison of average bout durations before and after sleep deprivation in (I)  
574 12hr daytime sleep deprivation experiment in *Aedes aegypti* (n = 64, individuals with zero values  
575 were included) and (J) 12hr daytime sleep deprivation experiment in *Anopheles stephensi* (n = 36,  
576 individuals with zero values were included). Test of significant difference between groups was  
577 carried out using wilcoxon signed rank test (ns = not significant, \*\*\* =  $p < 0.001$ ).

578

579

580

581

582 **Videos**

583 **Supplemental - Videos of host landing between control and sleep-deprived mosquitoes.**

584 Available upon request.

585

586 **Acknowledgements**

587 We thank Diane Eilerts for fruitful discussions about the project, and Zhijian Jake Tu for providing  
588 females of the Indian strain of *Anopheles stephensi*, a representative of the type form. The  
589 following reagent was obtained through BEI Resources, NIAID, NIH: *Aedes aegypti*, Strain LVP-  
590 IB12, Eggs, MRA-735, contributed by David W. Severson.

591

592 **Funding**

593 Research reported in this publication was partially supported by the National Institute of Allergy  
594 and Infectious Diseases of the National Institutes of Health under Award Number R01AI148551  
595 (to J.B.B. for shared incubator space), University of Cincinnati Sigma Xi (to O.M.A.), the  
596 National Institute of Food and Agriculture of the United States Department of Agriculture, Hatch  
597 project 1017860 (to C.V.), and partially supported by the National Institute of Allergy and  
598 Infectious Diseases of the National Institutes of Health under Award number R01AI155785 (to  
599 C.V.).

600

601

602

603

604

## 605 References

- 606 1. Nath RD, Bedbrook CN, Abrams MJ, Basinger T, Bois JS, Prober DA, Sternberg PW,  
607 Gradinaru V, Goentoro L. 2017 The Jellyfish *Cassiopea* Exhibits a Sleep-like State. *Curr.*  
608 *Biol.* **27**, 2984–2990.
- 609 2. Raizen DM, Zimmerman JE, Maycock MH, Ta UD, You Y-J, Sundaram MV, Pack AI.  
610 2008 Lethargus is a *Caenorhabditis elegans* sleep-like state. *Nature.* **451**, 569–572.  
611 (doi:10.1038/nature06535)
- 612 3. Tobler I. 1983 Effect of forced locomotion on the rest-activity cycle of the cockroach.  
613 *Behav. Brain Res.* **8**, 351–360.
- 614 4. Helfrich-Förster C. 2018 Sleep in Insects. *Annu. Rev. Entomol.* **63**, 69–86.  
615 (doi:10.1146/annurev-ento-020117-043201)
- 616 5. Campbell SS, Tobler I. 1984 Animal sleep: a review of sleep duration across phylogeny.  
617 *Neurosci. Biobehav. Rev.* **8**, 269–300.
- 618 6. Kashiwagi M, Hayashi Y. 2020 The existence of two states of sleep as a common trait in  
619 various animals and its molecular and neuronal mechanisms. *Curr. Opin. Physiol* **15**, 197–  
620 202.
- 621 7. Harrison Y, Horne JA. 1999 One Night of Sleep Loss Impairs Innovative Thinking and  
622 Flexible Decision Making. *Organ. Behav. Hum. Decis. Process.* **78**, 128–145.
- 623 8. Drummond SPA, Brown GG, Christian Gillin J, Stricker JL, Wong EC, Buxton RB. 2000  
624 Altered brain response to verbal learning following sleep deprivation. *Nature* **403**, 655–657.
- 625 9. Rechtschaffen A, Bergmann BM. 2002 Sleep Deprivation in the Rat: An Update of the 1989  
626 Paper. *Sleep* **25**, 18–24.
- 627 10. Waters F, Chiu V, Atkinson A, Blom JD. 2018 Severe Sleep Deprivation Causes  
628 Hallucinations and a Gradual Progression Toward Psychosis With Increasing Time Awake.  
629 *Front. Psychiatry* **9**. (doi:10.3389/fpsy.2018.00303)
- 630 11. Klein BA, Klein A, Wray MK, Mueller UG, Seeley TD. 2010 Sleep deprivation impairs  
631 precision of waggle dance signaling in honey bees. *Proc. Natl. Acad. Sci. USA* **107**, 22705–  
632 22709.
- 633 12. Seugnet L, Suzuki Y, Vine L, Gottschalk L, Shaw PJ. 2008 D1 receptor activation in the  
634 mushroom bodies rescues sleep-loss-induced learning impairments in *Drosophila*. *Curr.*  
635 *Biol.* **18**, 1110–1117.
- 636 13. Seugnet L, Suzuki Y, Donlea JM, Gottschalk L, Shaw PJ. 2011 Sleep deprivation during  
637 early-adult development results in long-lasting learning deficits in adult *Drosophila*. *Sleep*  
638 **34**, 137–146.

- 639 14. Deboer T. 2013 Behavioral and Electrophysiological Correlates of Sleep and Sleep  
640 Homeostasis. In *Sleep, Neuronal Plasticity and Brain Function* (eds P Meerlo, RM Benca,  
641 T Abel), pp. 1–24. Springer.
- 642 15. Keene AC, Duboue ER. 2018 The origins and evolution of sleep. *J. Exp. Biol.* **221**,  
643 jeb159533.
- 644 16. Keenan S, Hirshkowitz M. 2010 Monitoring and staging human sleep. In *Principles and*  
645 *Practice of Sleep Medicine* (eds M Kryger, T Roth, W Dement), pp. 1602–1609.  
646 Amsterdam: Elsevier.
- 647 17. van Alphen B, Yap MHW, Kirszenblat L, Kottler B, van Swinderen B. 2013 A Dynamic  
648 Deep Sleep Stage in *Drosophila*. *J. Neurosci.* **33**, 6917–6927.
- 649 18. Hendricks JC, Finn SM, Panckeri KA, Chavkin J, Williams JA, Sehgal A, Pack AI. 2000  
650 Rest in *Drosophila* is a Sleep-like State. *Neuron* **25**, 129–138.
- 651 19. Shaw PJ, Cirelli C, Greenspan RJ, Tononi G. 2000 Correlates of sleep and waking in  
652 *Drosophila melanogaster*. *Science* **287**, 1834–1837.
- 653 20. Kaiser W. 1988 Busy bees need rest, too. *J. Comp. Physiol. A.* **163**, 565–584.  
654 (doi:10.1007/bf00603841)
- 655 21. Kaiser W. 1995 Rest at night in some solitary bees - a comparison with the sleep-like state  
656 of honey bees. *Apidologie* **26**, 213–230.
- 657 22. Linsley EG, Gorton Linsley E. 1962 Sleeping Aggregations of Aculeate Hymenoptera—II.  
658 *Ann. Entomol. Soc. Am.* **55**, 148–164.
- 659 23. Xie L *et al.* 2013 Sleep drives metabolite clearance from the adult brain. *Science* **342**, 373–  
660 377.
- 661 24. Schmidt MH. 2014 The energy allocation function of sleep: a unifying theory of sleep,  
662 torpor, and continuous wakefulness. *Neurosci. Biobehav. Rev.* **47**, 122–153.
- 663 25. Prather AA, Janicki-Deverts D, Hall MH, Cohen S. 2015 Behaviorally Assessed Sleep and  
664 Susceptibility to the Common Cold. *Sleep* **38**, 1353–1359.
- 665 26. Rund SSC, Hou TY, Ward SM, Collins FH, Duffield GE. 2011 Genome-wide profiling of  
666 diel and circadian gene expression in the malaria vector *Anopheles gambiae*. *Proc. Natl.*  
667 *Acad. Sci. USA* **108**, E421–E430.
- 668 27. Leming MT, Rund SSC, Behura SK, Duffield GE, O’Tousa JE. 2014 A database of  
669 circadian and diel rhythmic gene expression in the yellow fever mosquito *Aedes aegypti*.  
670 *BMC Genom.* **15**, 1–9.
- 671 28. Rund SSC, O’Donnell AJ, Gentile JE, Reece SE. 2016 Daily Rhythms in Mosquitoes and  
672 Their Consequences for Malaria Transmission. *Insects* **7**, 14.

- 673 29. Haufe WO. 1963 Ethological and statistical aspects of a quantal response in mosquitoes to  
674 environmental stimuli. *Behaviour* **20**, 221–241.
- 675 30. Ajayi OM, Eilerts DF, Bailey ST, Vinauger C, Benoit JB. 2020 Do Mosquitoes Sleep?  
676 *Trends Parasitol.* **36**, 888–897.
- 677 31. Ramón F, Hernández-Falcón J, Nguyen B, Bullock TH. 2004 Slow wave sleep in crayfish.  
678 *Proc. Natl. Acad. Sci. USA* **101**, 11857–11861.
- 679 32. Eban-Rothschild AD, Bloch G. 2008 Differences in the sleep architecture of forager and  
680 young honeybees (*Apis mellifera*). *J. Exp. Biol.* **211**, 2408–2416.
- 681 33. Raccuglia D *et al.* 2019 Network-Specific Synchronization of Electrical Slow-Wave  
682 Oscillations Regulates Sleep Drive in *Drosophila*. *Curr. Biol.* **29**, 3611–3621.e3.
- 683 34. van Alphen B, Semenza ER, Yap M, van Swinderen B, Allada R. 2021 A deep sleep stage  
684 in *Drosophila* with a functional role in waste clearance. *Sci. Adv.* **7**, eabc2999.  
685 (doi:10.1126/sciadv.abc2999)
- 686 35. Prober DA, Rihel J, Onah AA, Sung R-J, Schier AF. 2006 Hypocretin/Orexin  
687 Overexpression Induces An Insomnia-Like Phenotype in Zebrafish. *J. Neurosci.* **26**, 13400–  
688 13410.
- 689 36. Yokogawa T, Marin W, Faraco J, Pézeron G, Appelbaum L, Zhang J, Rosa F, Mourrain P,  
690 Mignot E. 2007 Characterization of Sleep in Zebrafish and Insomnia in Hypocretin  
691 Receptor Mutants. *PLoS Biol.* **5**, e277.
- 692 37. Huber R, Hill SL, Holladay C, Biesiadecki M, Tononi G, Cirelli C. 2004 Sleep Homeostasis  
693 in *Drosophila Melanogaster*. *Sleep.* **27**, 628–639. (doi:10.1093/sleep/27.4.628)
- 694 38. Tuchinda P, Kitaoka M, Ogata T, Kurihara T. 1969 On the diurnal rhythm of biting  
695 behavior of *Aedes aegypti* in relation to the age and to the hemorrhagic fever in Bangkok,  
696 1964. *Jpn. J. Trop. Med.* **10**, 1–6. (doi:10.2149/tmh1969.10.1)
- 697 39. Rund SSC, Labb LF, Benefiel OM, Duffield GE. 2020 Artificial Light at Night Increases  
698 *Aedes aegypti* Mosquito Biting Behavior with Implications for Arboviral Disease  
699 Transmission. *Am. J. Trop. Med. Hyg.* **103**, 2450–2452. (doi:10.4269/ajtmh.20-0885)
- 700 40. Veronesi R, Gentile G, Carrieri M, Maccagnani B, Stermieri L, Bellini R. 2012 Seasonal  
701 pattern of daily activity of *Aedes caspius*, *Aedes detritus*, *Culex modestus*, and *Culex pipiens*  
702 in the Po Delta of northern Italy and significance for vector-borne disease risk assessment.  
703 *J. Vector Ecol.* **37**, 49–61.
- 704 41. Tobler I I, Neuner-Jehle M. 1992 24-h variation of vigilance in the cockroach *Blaberus*  
705 *giganteus*. *J. Sleep Res.* **1**, 231–239.
- 706 42. Becker N, Petric D, Zgomba M, Boase C, Minoo M, Dahl C, Kaiser A. 2010 *Mosquitoes*  
707 *and Their Control*. Springer.

- 708 43. Rund SSC, Bonar NA, Champion MM, Ghazi JP, Houk CM, Leming MT, Syed Z, Duffield  
709 GE. 2013 Daily rhythms in antennal protein and olfactory sensitivity in the malaria  
710 mosquito *Anopheles gambiae*. *Sci. Rep.* **3**, 2494.
- 711 44. Guelbéogo WM *et al.* 2018 Variation in natural exposure to anopheles mosquitoes and its  
712 effects on malaria transmission. *Elife* **7**, e32625.
- 713 45. Andretic R, Shaw PJ. 2005 Essentials of sleep recordings in *Drosophila*: moving beyond  
714 sleep time. *Methods Enzymol.* **393**, 759–772.
- 715 46. Prabhakaran PM, Sheeba V. 2012 Sympatric *Drosophilid* species *melanogaster* and  
716 *ananassae* differ in temporal patterns of activity. *J. Biol. Rhythms* **27**, 365–376.
- 717 47. Bertossa RC, van Dijk J, Diao W, Saunders D, Beukeboom LW, Beersma DGM. 2013  
718 Circadian rhythms differ between sexes and closely related species of *Nasonia* wasps. *PLoS*  
719 *One* **8**, e60167.
- 720 48. Tobler I, Stalder J. 1988 Rest in the scorpion - a sleep-like state? *J. Comp. Physiol. A.* **163**,  
721 227–235. (doi:10.1007/bf00612431)
- 722 49. Sauer S, Herrmann E, Kaiser W. 2004 Sleep deprivation in honey bees. *J. Sleep Res.* **13**,  
723 145–152.
- 724 50. Kanaya HJ *et al.* 2020 A sleep-like state in *Hydra* unravels conserved sleep mechanisms  
725 during the evolutionary development of the central nervous system. *Sci. Adv.* **6**, abb9415.
- 726 51. Foster RG, Wulff K. 2005 The rhythm of rest and excess. *Nat. Rev. Neurosci.* **6**, 407–414.
- 727 52. Potdar S, Daniel DK, Thomas FA, Lall S, Sheeba V. 2018 Sleep deprivation negatively  
728 impacts reproductive output in *Drosophila melanogaster*. *J. Exp. Biol.* **221**.  
729 (doi:10.1242/jeb.174771)
- 730 53. Donlea JM, Thimman MS, Suzuki Y, Gottschalk L, Shaw PJ. 2011 Inducing sleep by remote  
731 control facilitates memory consolidation in *Drosophila*. *Science* **332**, 1571–1576.
- 732 54. Dissel S *et al.* 2015 Sleep restores behavioral plasticity to *Drosophila* mutants. *Curr. Biol.*  
733 **25**, 1270–1281.
- 734 55. Kayser MS, Mainwaring B, Yue Z, Sehgal A. 2015 Sleep deprivation suppresses aggression  
735 in *Drosophila*. *Elife* **4**, e07643.
- 736 56. Toda H, Williams JA, Gullledge M, Sehgal A. 2019 A sleep-inducing gene, *nemuri*, links  
737 sleep and immune function in *Drosophila*. *Science*. **363**, 509–515.  
738 (doi:10.1126/science.aat1650)
- 739 57. Williams JA, Sathyanarayanan S, Hendricks JC, Sehgal A. 2007 Interaction Between Sleep  
740 and the Immune Response in *Drosophila*: A Role for the NFκB Relish. *Sleep*. **30**, 389–400.  
741 (doi:10.1093/sleep/30.4.389)

- 742 58. Kuo T-H, Williams JA. 2014 Increased sleep promotes survival during a bacterial infection  
743 in *Drosophila*. *Sleep* **37**, 1077–86, 1086A–1086D.
- 744 59. Murdock CC, Moller-Jacobs LL, Thomas MB. 2013 Complex environmental drivers of  
745 immunity and resistance in malaria mosquitoes. *Proc. Biol. Sci.* **280**, 20132030.
- 746 60. Garrett-Jones C, Shidrawi GR. 1969 Malaria vectorial capacity of a population of  
747 *Anopheles gambiae*: an exercise in epidemiological entomology. *Bull. World Health Organ.*  
748 **40**, 531–545.
- 749 61. Dye C. 1986 Vectorial capacity: must we measure all its components? *Parasitol. Today* **2**,  
750 203–209.
- 751 62. Benoit JB, Vinauger C. 2022 Chronobiology of blood feeding arthropods: influences of  
752 their role as disease vectors. In *Sensory Ecology of Disease Vectors* (eds S Hill, I R., M  
753 Lorenzo), p. In press.
- 754 63. Westwood ML, O'Donnell AJ, de Bekker C, Lively CM, Zuk M, Reece SE. 2019 The  
755 evolutionary ecology of circadian rhythms in infection. *Nat. Ecol. Evol.* **3**, 552–560.
- 756 64. Lima-Camara TN, Lima JBP, Bruno RV, Peixoto AA. 2014 Effects of insemination and  
757 blood-feeding on locomotor activity of *Aedes albopictus* and *Aedes aegypti* (Diptera:  
758 Culicidae) females under laboratory conditions. *Parasit. Vectors* **7**, 1–8.
- 759 65. Rosendale AJ, Dunlevy ME, McCue MD, Benoit JB. 2019 Progressive behavioural,  
760 physiological and transcriptomic shifts over the course of prolonged starvation in ticks. *Mol.*  
761 *Ecol.* **28**, 49–65.
- 762 66. Rund SSC, Lee SJ, Bush BR, Duffield GE. 2012 Strain- and sex-specific differences in  
763 daily flight activity and the circadian clock of *Anopheles gambiae* mosquitoes. *J. Insect*  
764 *Physiol.* **58**, 1609–1619.
- 765 67. Geissmann Q, Rodriguez LG, Beckwith EJ, Gilestro GF. 2019 Rethomics: An R framework  
766 to analyse high-throughput behavioural data. *PLoS One* **14**, e0209331.
- 767 68. Barnard DR, Knue GJ, Dickerson CZ, Bernier UR, Kline DL. 2011 Relationship between  
768 mosquito (Diptera: Culicidae) landing rates on a human subject and numbers captured using  
769 CO<sub>2</sub>-baited light traps. *Bull. Entomol. Res.* **101**, 277–285.
- 770 69. Hagan RW *et al.* 2018 Dehydration prompts increased activity and blood feeding by  
771 mosquitoes. *Sci. Rep.* **8**, 1–12.

772

# Figure 1

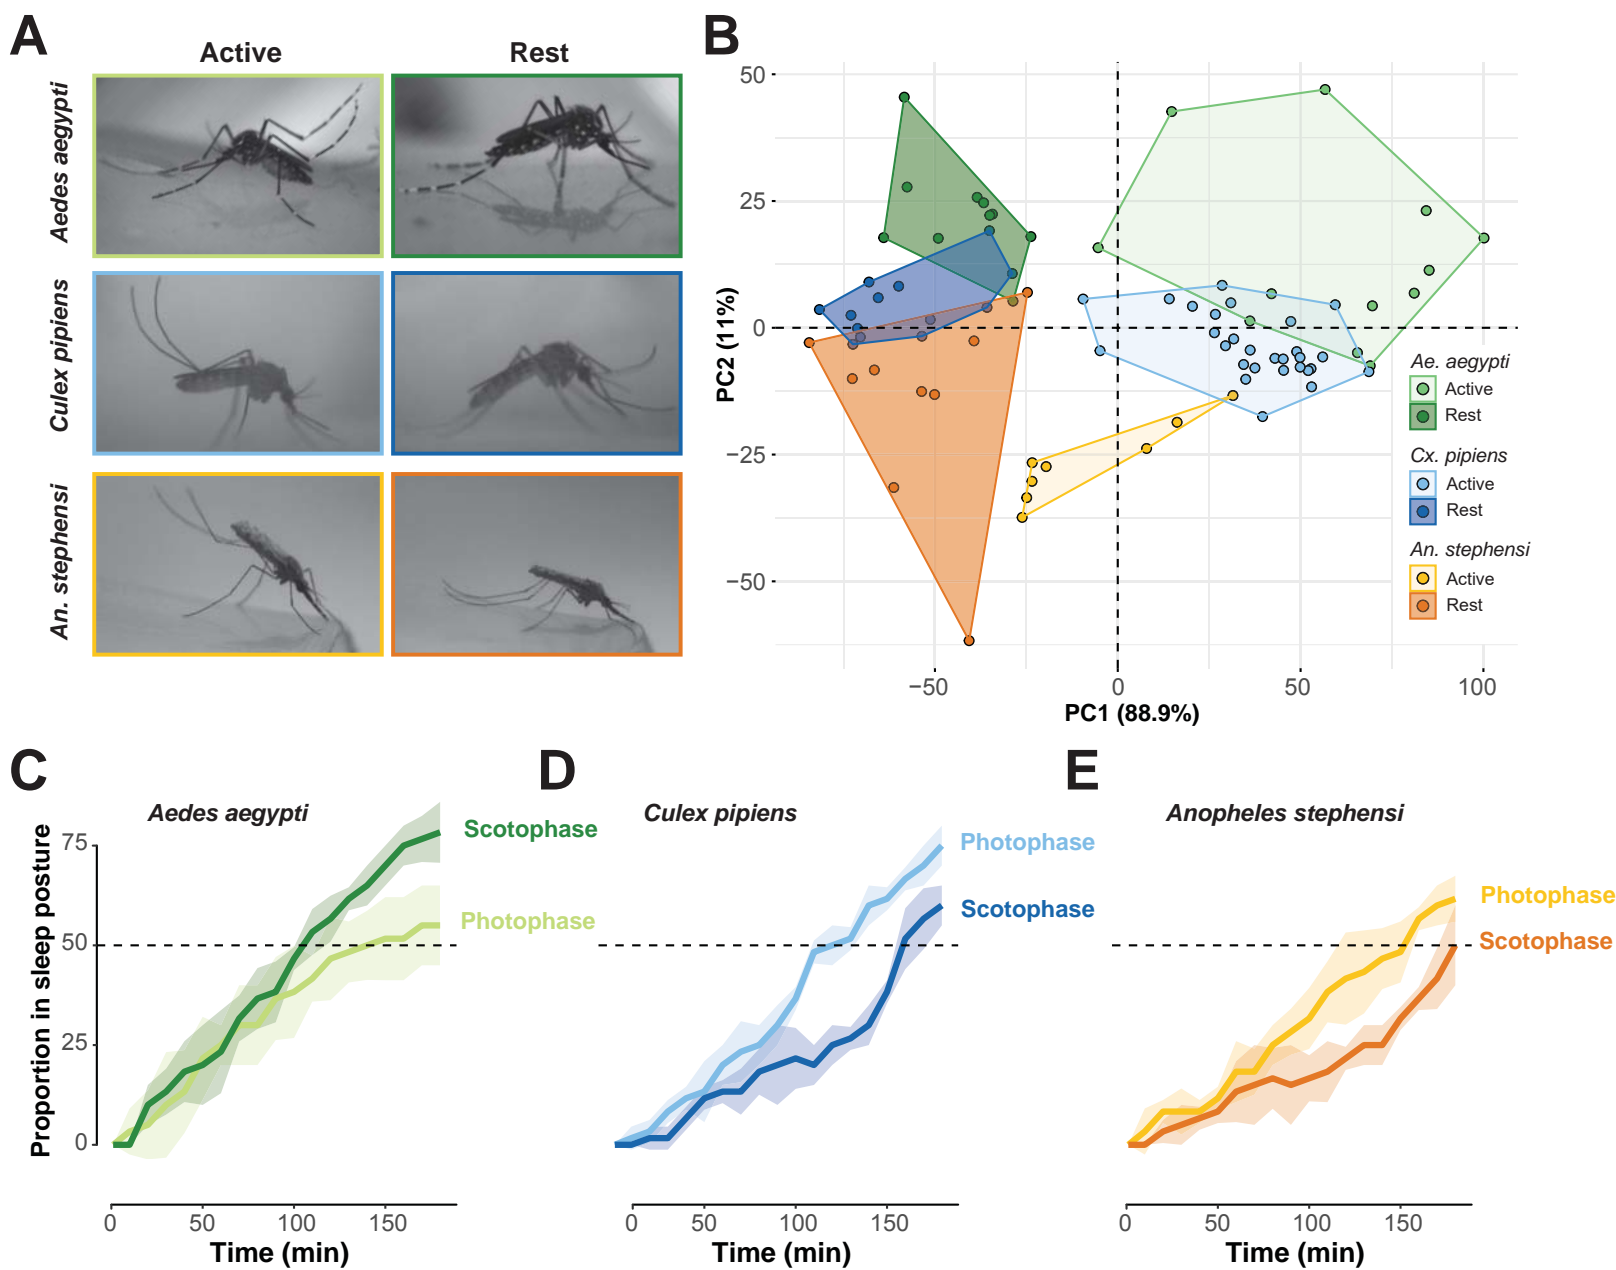



# Figure 2

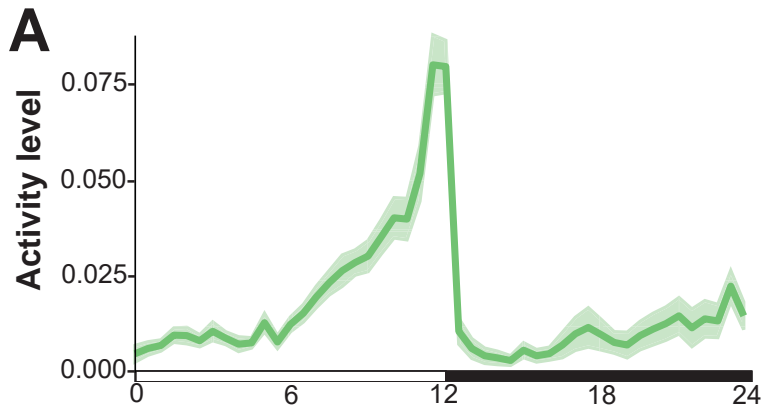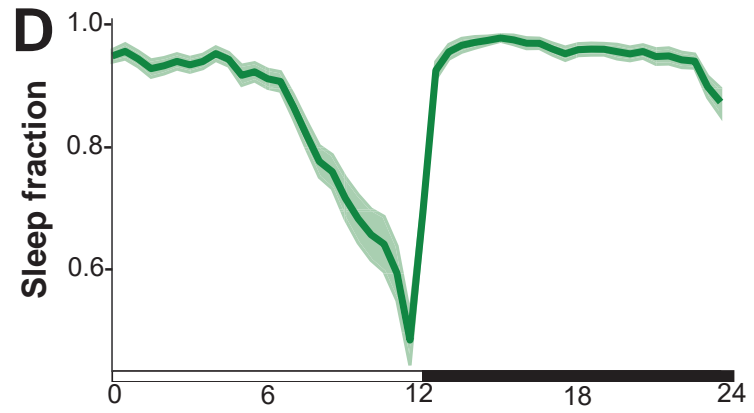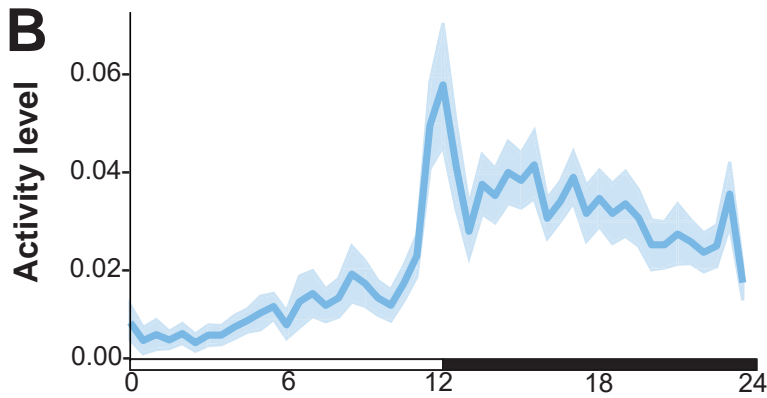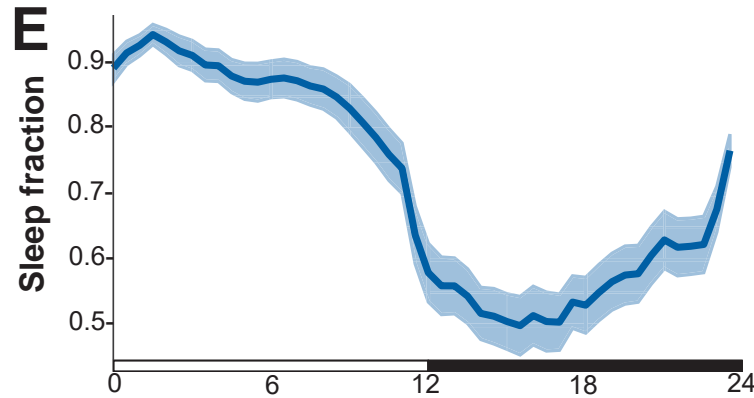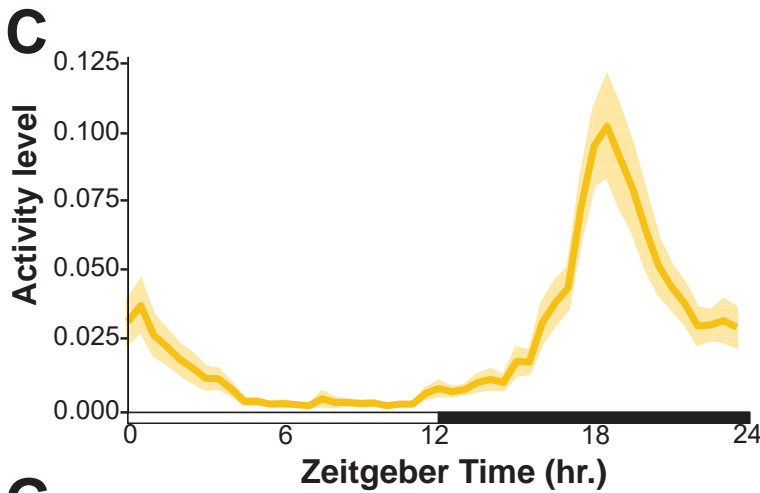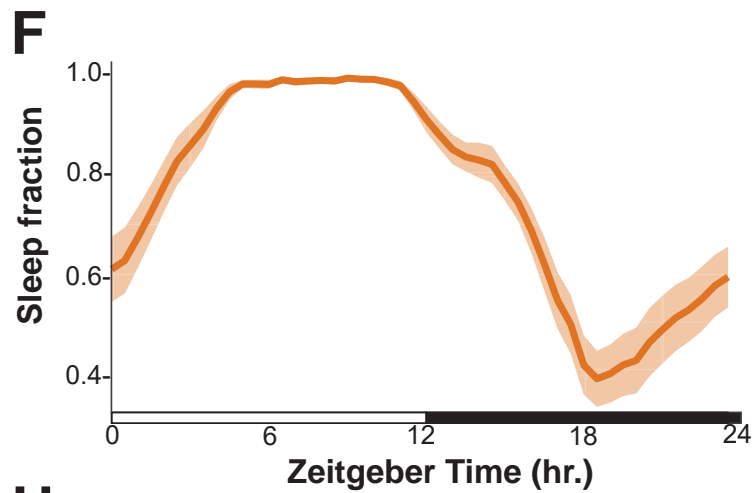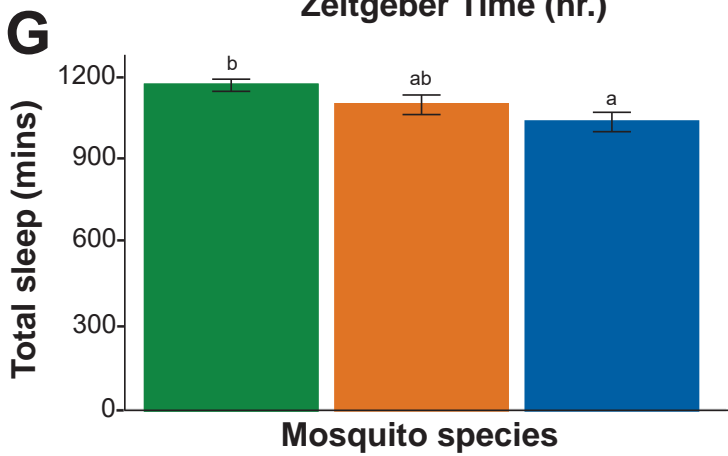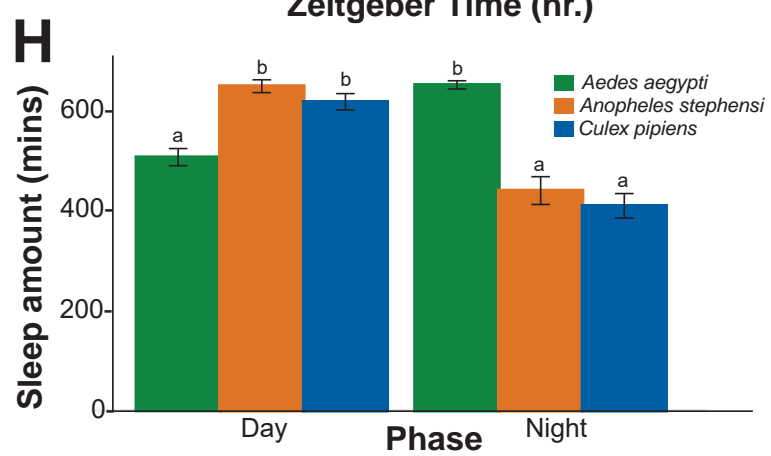

# Figure 3

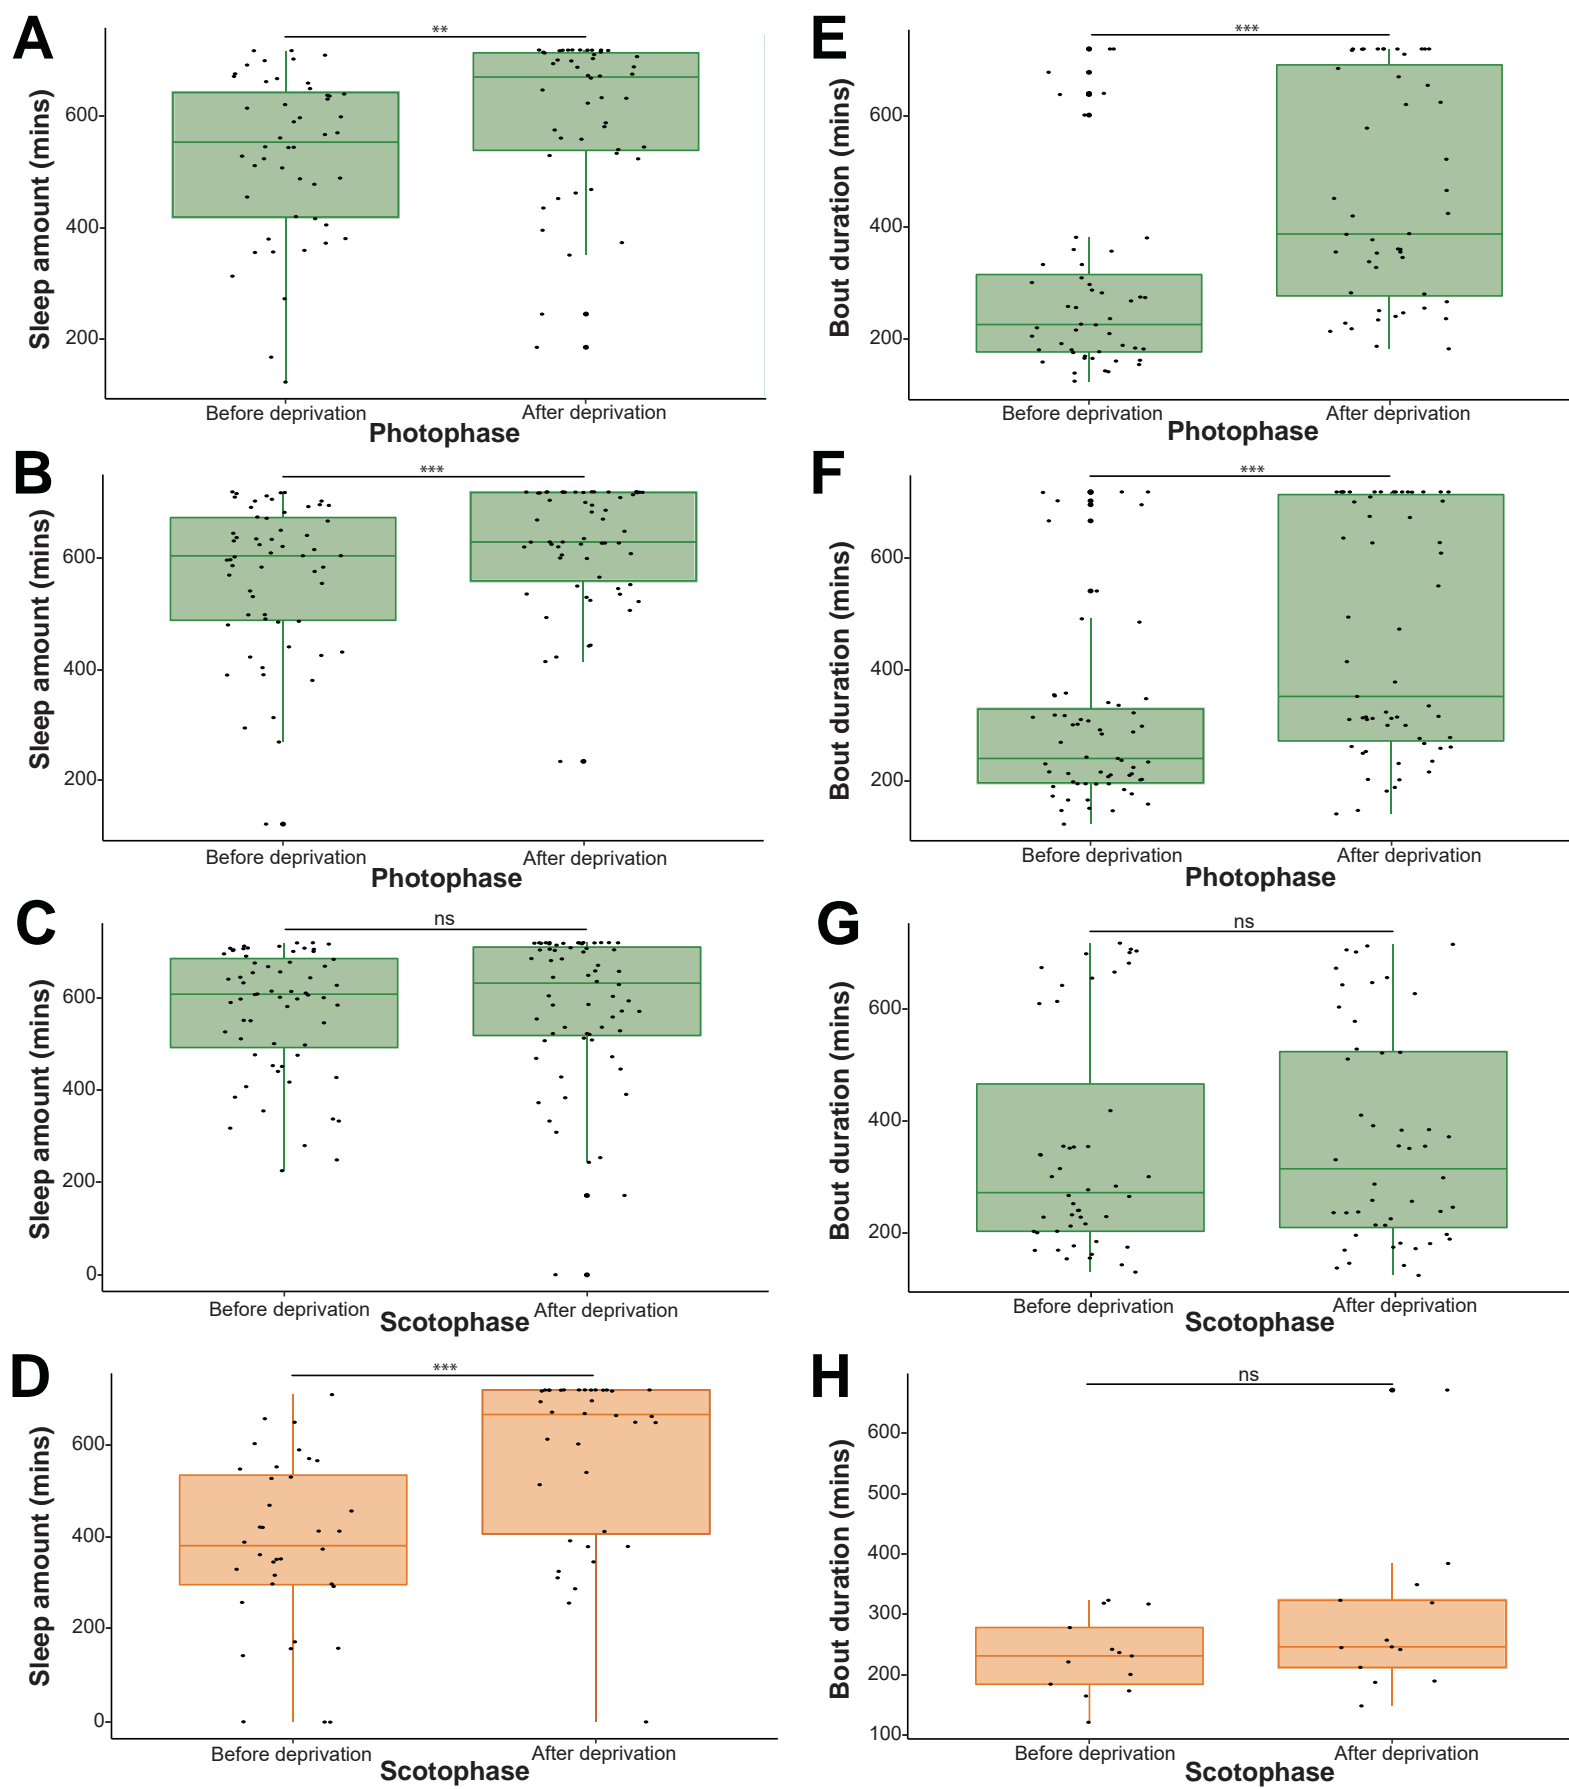

# Figure 4

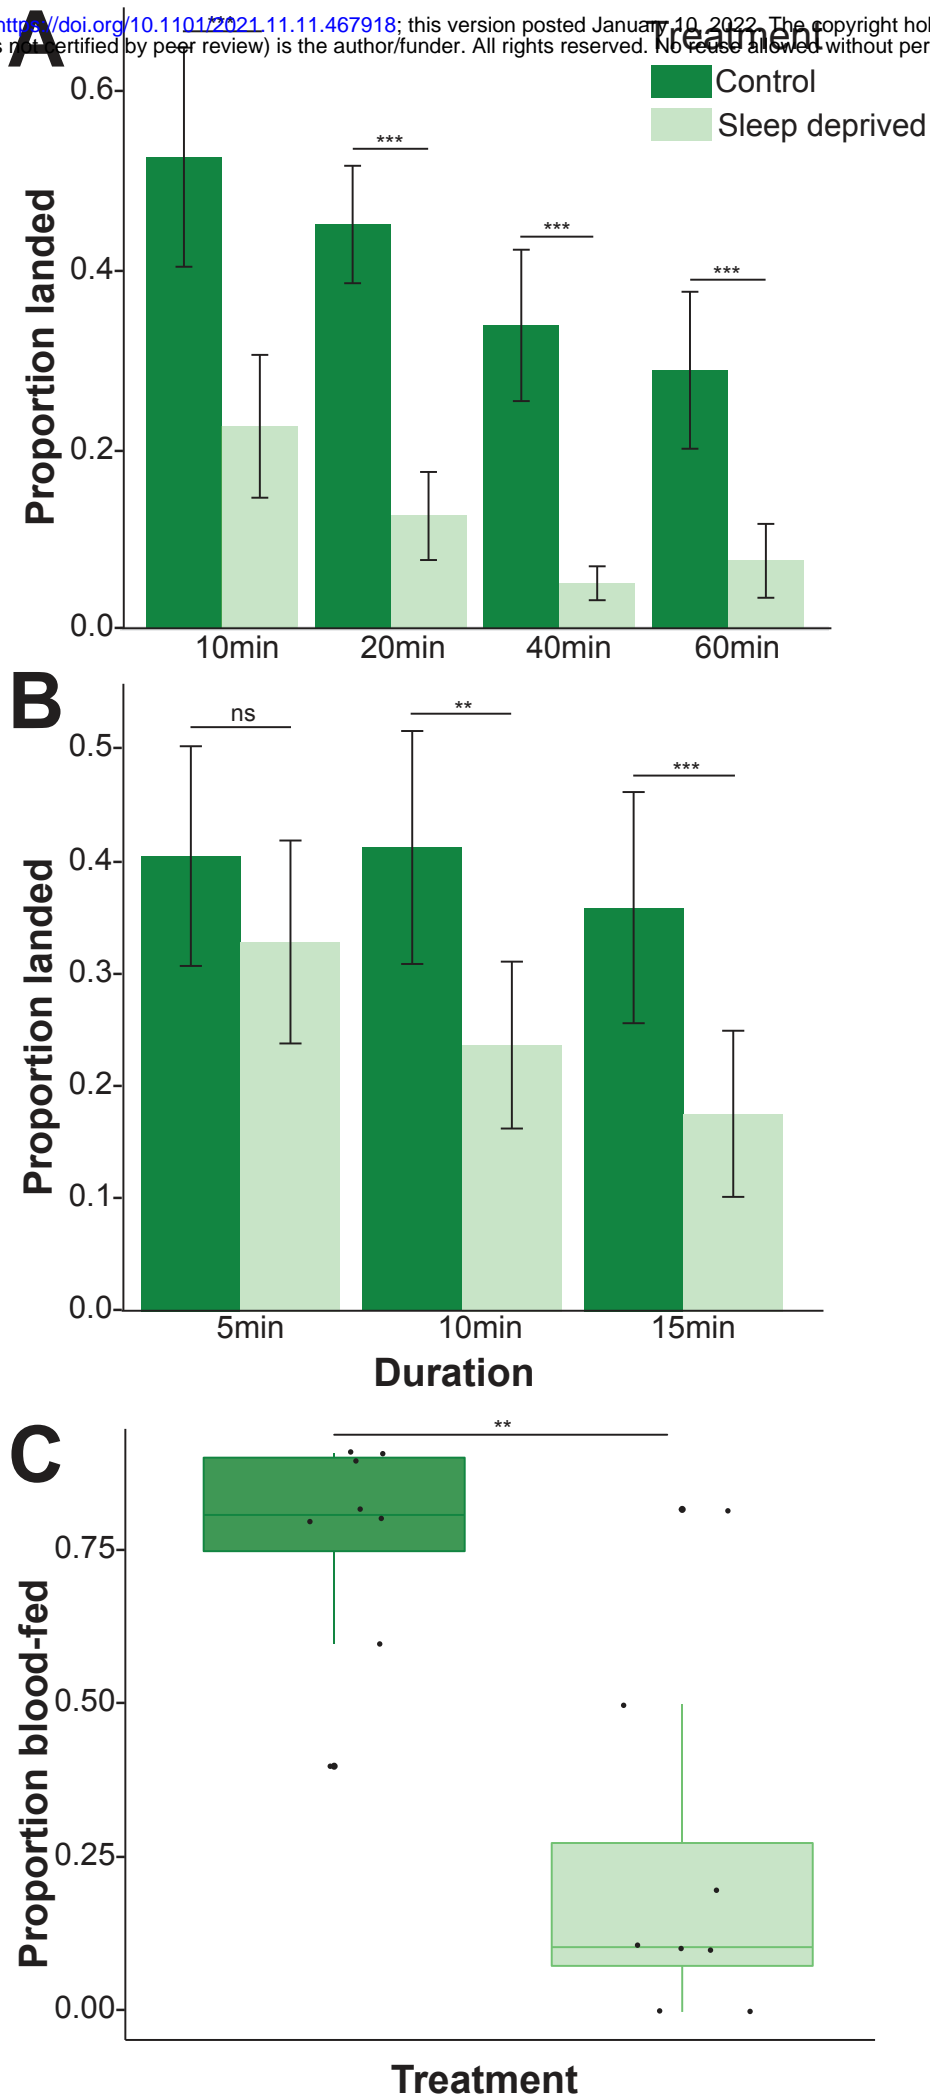

# Figure S1

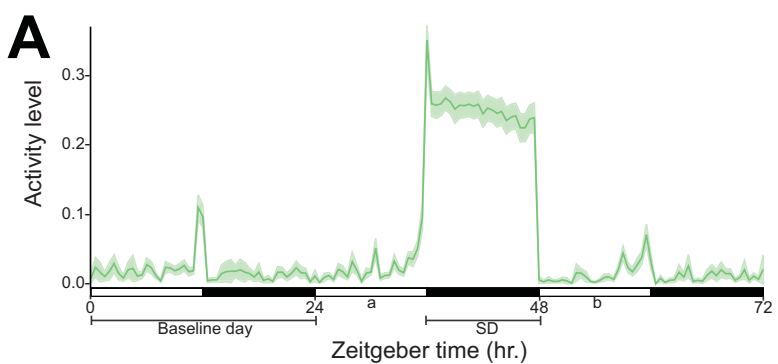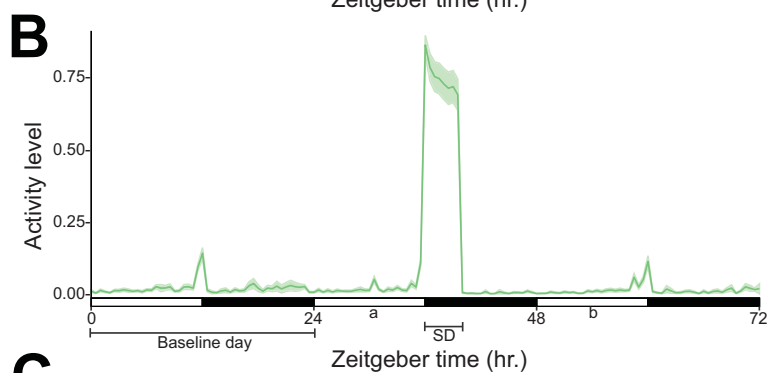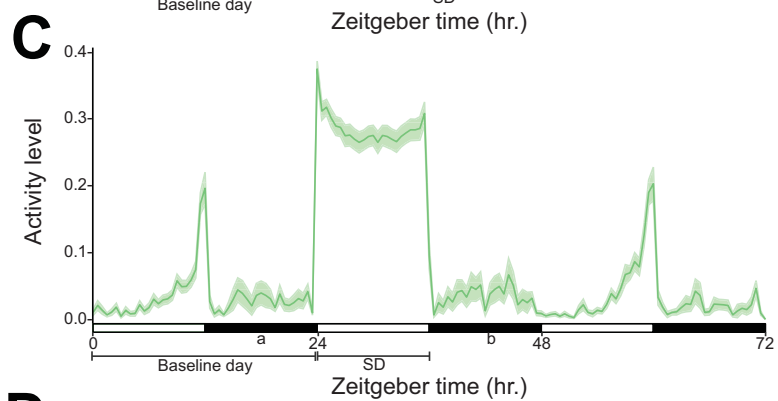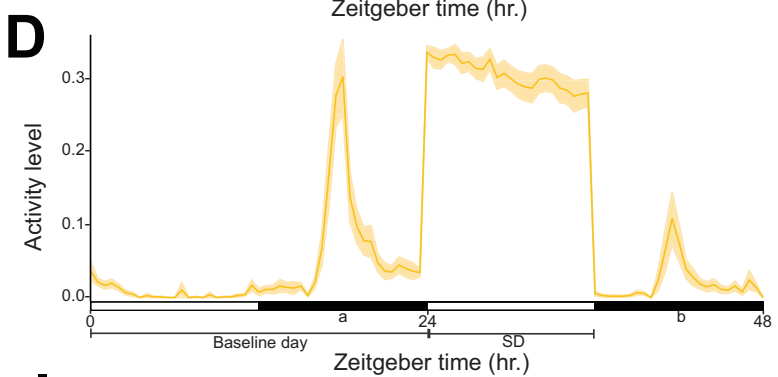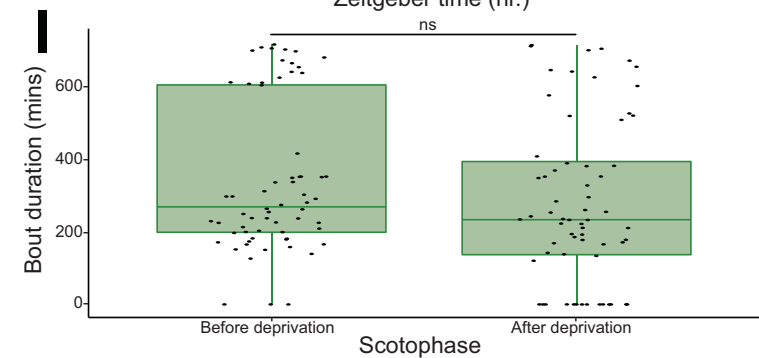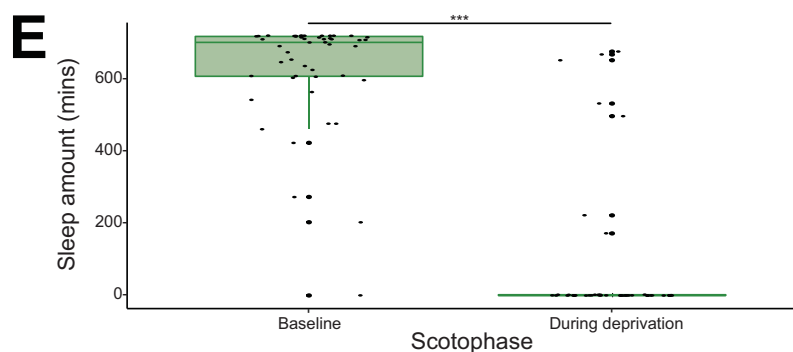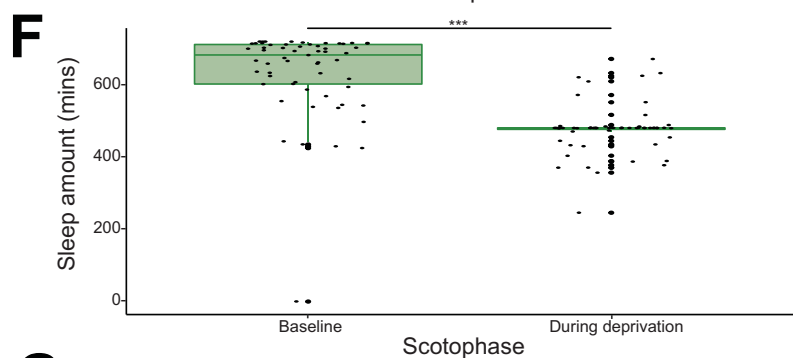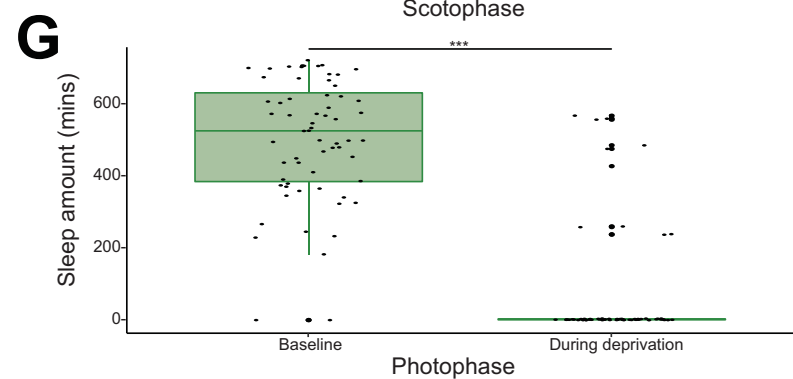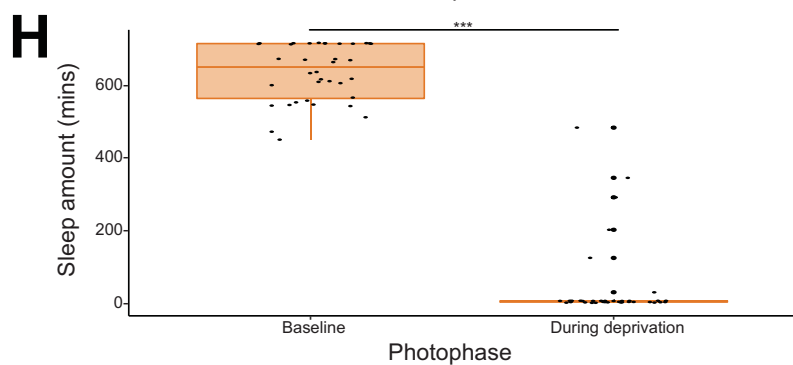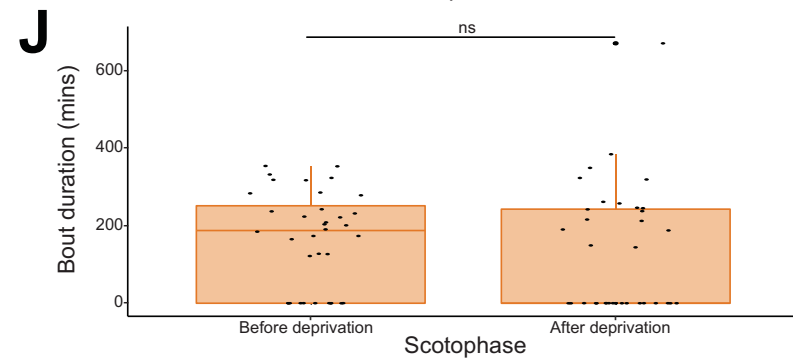

Source: https://www.biorxiv.org/content/10.1101/2021.11.11.467918v3.full.pdf
